# Supplementary material
Source: PubMed Central journal article supplement (PMC3088577)
Supplement: 1016687108_pnas.1016687108_SI.pdf [file 1016687108_pnas.1016687108_SI.pdf]

# Supporting Information

Hamel et al. 10.1073/pnas.1016687108

Four movie files are associated with this manuscript. In all movies, the laser appears after a few frames as a small light spot.

All movies are filmed at 1,000 images/sec and shown at 20 frames/sec.

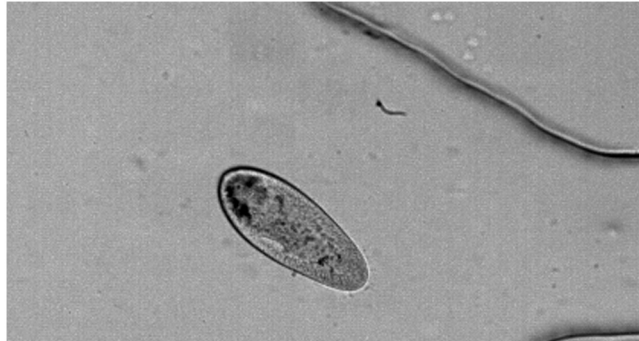

**Movie S1.** Cilia escape: A weak aggression (laser power 50 mW) leads to the cell swimming away with its cilia. Here we see the coordinated beating that leads to a fluctuating velocity.

[Movie S1 \(MOV\)](#)

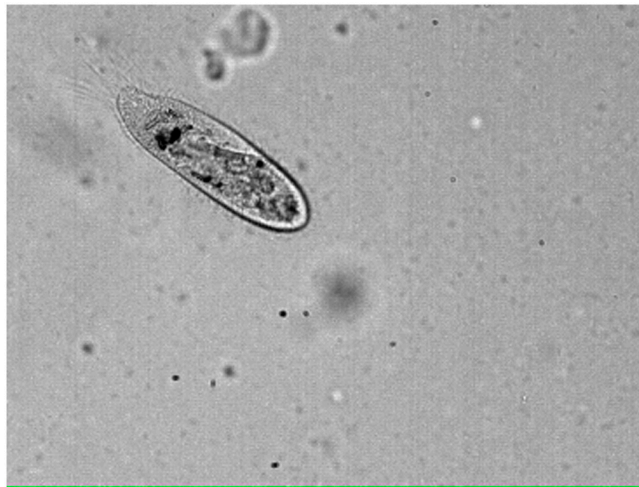

**Movie S2.** Trichocyst escape: *Paramecium* cell escaping using its trichocysts. Laser power is 125 mW. The cell begins by ejecting the trichocysts in the direction of the laser, then continues escaping with the ciliary beating.

[Movie S2 \(MOV\)](#)

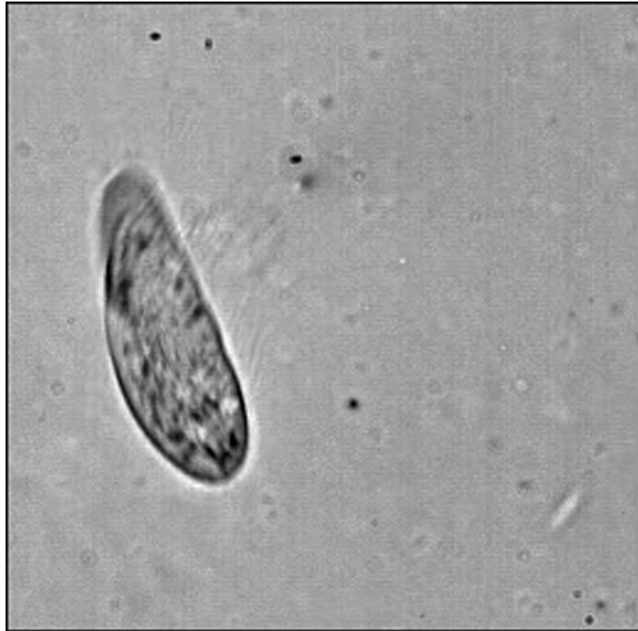

**Movie S3.** Sideways escape: An aggression originating from the lateral position along the cell leads to a sideways jump for a wild-type cell. Laser power is 125 mW.

[Movie S3 \(MOV\)](#)

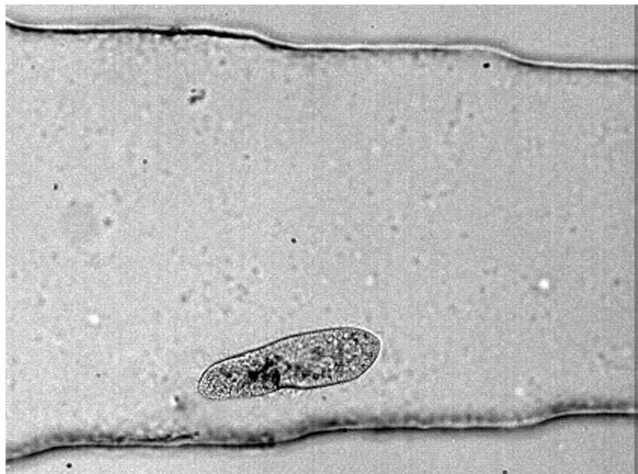

**Movie S4.** Mutant escape: A nondischarge mutant cannot respond with its trichocysts to a lateral aggression. Instead it is forced to swim with its cilia in an inefficient trajectory. Same conditions as in Movie S3.

[Movie S4 \(MOV\)](#)
